# Supplementary material for: Sulphate-selective optical microsensors: overcoming the hydration energy penalty
Source: Royal Society of Chemistry journal article supplement (doi:10.1039/c5cc02350e), 2015-01-01

Supporting information for

## **Sulphate-selective optical microsensors: overcoming the hydration energy penalty<sup>†</sup>**

Tomàs Guinovart, Pascal Blondeau and Francisco J. Andrade<sup>\*</sup>

## Experimental section

**Reagents:** Latex beads (polystyrene, 0.8  $\mu\text{m}$  mean particle size, without azide), 1,3-[Bis(3-phenylthioureidomethyl)]benzene (sulfate ionophore I, Selectophore), tridodecylmethylammonium chloride (TDMACl, Selectophore), tetrahydrofuran (THF, anhydrous 99.9 %), magnesium acetate tetrahydrate (99% purity); analytical grade sodium salts of sulfate, thiocyanate, chloride, bromide, lactate, salicylate and nitrate were all purchased from Sigma-Aldrich (Spain). Acetic acid (96% purity) was obtained from Riedel-de Haën (Germany). Doubly distilled deionized water ( $18.1 \text{ M}\Omega\cdot\text{cm}^{-1}$  resistance) was produced by a Milli-Q water system (Millipore Corporation, Bedford, MA). The chromoionophore fluorescein octadecyl ether was synthesized according to a previous report.<sup>1</sup>

### $\text{SO}_4^{2-}$ -selective polystyrene microspheres: Preparation.

#### 1. THF cocktail

Stock solutions of 10 mM of the chromoionophore, 10 mM of sulfate ionophore I and 10 mM of TDMACl in THF were firstly prepared. 300  $\mu\text{l}$  of the chromoionophore, 300  $\mu\text{l}$  of sulfate ionophore I, 270  $\mu\text{l}$  of TDMACl and 130  $\mu\text{l}$  of THF were mixed to obtain a final solution of 1 ml THF (3 mM Chromoionophore, 2.7 mM TDMACl and 3 mM sulphate ionophore I).

#### 2. Sensing polystyrene beads

10  $\mu\text{l}$  of latex beads (polystyrene) were diluted to 40 mL of  $\text{H}_2\text{O}$ . 0.5 mL of the THF cocktail were pipetted and mixed with 4.5 mL of the diluted PS microspheres suspension on a vortex with a spinning speed of 1200 rpm. The yellow suspension is then blown with compressed  $\text{N}_2$  for 20 min to remove THF.

### $\text{SO}_4^{2-}$ -selective polystyrene microspheres: System and measurements.

The system works in exhaustive sensing mode by mixing the PS beads prepared previously with a 30 mM acetic acid/magnesium acetate buffer at pH 4 in a ratio of 2:1 of PS and buffer respectively, thus a final concentration of 10 mM of buffer will be obtained in the system. Calibration curves were recorded by gradual addition of  $\text{Na}_2\text{SO}_4$  or other salt stock solutions.

### Instrumentation.

Absorbance measurements were carried out in a 8453 UV-Vis spectrophotometer from Agilent Technologies (Barcelona, SPAIN) with an OS High Precision Cell optical glass cuvette of 10 mm light path (Hellma Analytics, Germany). pH values were obtained with a pH meter GLP 21 from CRISON (Alella, Barcelona).

**Table S1.** Values of concentration of each compound in the THF cocktail to find the most selective composition.

| <i>Chromoionophore</i><br>(mM) | <i>TDMACl</i><br>(mM) | <i>Sulfate ionophore</i><br>(mM) | <i>Abs SO<sub>4</sub><sup>2-</sup></i><br><i>/ Abs Cl-</i> | <i>Abs SO<sub>4</sub><sup>2-</sup> /</i><br><i>Abs SCN-</i> |
|--------------------------------|-----------------------|----------------------------------|------------------------------------------------------------|-------------------------------------------------------------|
| 2.0                            | 1.6                   | -                                | 5.15                                                       | 1.15                                                        |
| 1.6                            | 2.0                   | -                                | 5.02                                                       | 1.52                                                        |
| <b>3.0</b>                     | <b>2.7</b>            | -                                | <b>3.01</b>                                                | <b>2.04</b>                                                 |
| 2.7                            | 3.0                   | -                                | 3.56                                                       | 1.78                                                        |
| 4.0                            | 3.6                   | -                                | 2.94                                                       | 1.73                                                        |
| 3.6                            | 4.0                   | -                                | 3.72                                                       | 1.75                                                        |
| <b>3.0</b>                     | <b>2.7</b>            | <b>3</b>                         | <b>4.29</b>                                                | <b>2.48</b>                                                 |

**Table S2.** Results of all the samples predicted with additional amounts of known  $\text{SO}_4^{2-}$  concentrations predicted for validation of the system, and the recoveries obtained for each concentration.

|                         |                                  |                     |
|-------------------------|----------------------------------|---------------------|
| <b>Biological range</b> | <i>4.1 – 29.1 mM<sup>2</sup></i> |                     |
| <b>Sample 1</b>         | <i>8.4 ± 0.3 mM</i>              |                     |
| <b>Added (μM)</b>       | <b>Predicted (μM)</b>            | <b>Recovery (%)</b> |
| 3.9                     | 4.0 ± 0.2                        | 97 ± 4              |
| 4.8                     | 4.9 ± 0.1                        | 99 ± 3              |
| 5.8                     | 5.8 ± 0.1                        | 100 ± 3             |
| 6.8                     | 6.8 ± 0.2                        | 100 ± 4             |
| 7.6                     | 7.8 ± 0.5                        | 102 ± 7             |
| <b>Sample 2</b>         | <i>9.5 ± 0.6 mM</i>              |                     |
| <b>Added (μM)</b>       | <b>Predicted (μM)</b>            | <b>Recovery (%)</b> |
| 5.7                     | 5.7 ± 0.1                        | 98 ± 3              |
| 6.7                     | 6.6 ± 0.1                        | 100 ± 2             |
| 7.6                     | 7.5 ± 0.3                        | 101 ± 5             |
| 8.6                     | 8.4 ± 0.2                        | 103 ± 3             |
| 9.5                     | 9.1 ± 0.3                        | 105 ± 6             |
| <b>Sample 3</b>         | <i>20.0 ± 0.1 mM</i>             |                     |
| <b>Added (μM)</b>       | <b>Predicted (μM)</b>            | <b>Recovery (%)</b> |
| 11.0                    | 10.8 ± 0.3                       | 101 ± 4             |
| 11.9                    | 11.7 ± 0.4                       | 102 ± 6             |
| 12.8                    | 12.6 ± 0.2                       | 102 ± 3             |
| 13.9                    | 13.5 ± 0.2                       | 103 ± 4             |
| 14.9                    | 14.5 ± 0.5                       | 102 ± 8             |
| <b>Sample 4</b>         | <i>11.9 ± 0.2 mM</i>             |                     |
| <b>Added (μM)</b>       | <b>Predicted (μM)</b>            | <b>Recovery (%)</b> |
| 6.9                     | 6.9 ± 0.1                        | 99 ± 2              |
| 7.9                     | 7.9 ± 0.1                        | 100 ± 3             |
| 8.9                     | 8.7 ± 0.3                        | 102 ± 5             |
| 9.8                     | 9.5 ± 0.2                        | 104 ± 3             |
| 10.8                    | 10.4 ± 0.3                       | 105 ± 4             |
| <b>Sample 5</b>         | <i>8.2 ± 0.6 mM</i>              |                     |
| <b>Added (μM)</b>       | <b>Predicted (μM)</b>            | <b>Recovery (%)</b> |
| 4.3                     | 4.4 ± 0.3                        | 99 ± 5              |
| 5.3                     | 5.4 ± 0.2                        | 98 ± 3              |
| 6.3                     | 6.2 ± 0.1                        | 101 ± 2             |
| 7.3                     | 7.0 ± 0.5                        | 104 ± 6             |
| 8.3                     | 7.9 ± 0.2                        | 105 ± 4             |

<sup>2</sup> Appel, L. J. In *Dietary reference intakes for water, sodium, potassium, chloride and sulfate*. The National Academies Press, **2005**; pp. 424 – 448.

**Fig. S1.** Up: Calibration curves for a  $\text{SO}_4^{2-}$ -selective PS microspheres with the difference in absorbance at 459 nm ( $A_0 - A$ ) against  $\text{SO}_4^{2-}$  and other interfering anions. Down: Calibration curves for a PS microspheres optical system (without sulphate ionophore) with the difference in absorbance at 459 nm ( $A_0 - A$ ) against  $\text{SO}_4^{2-}$  and other interfering anions.

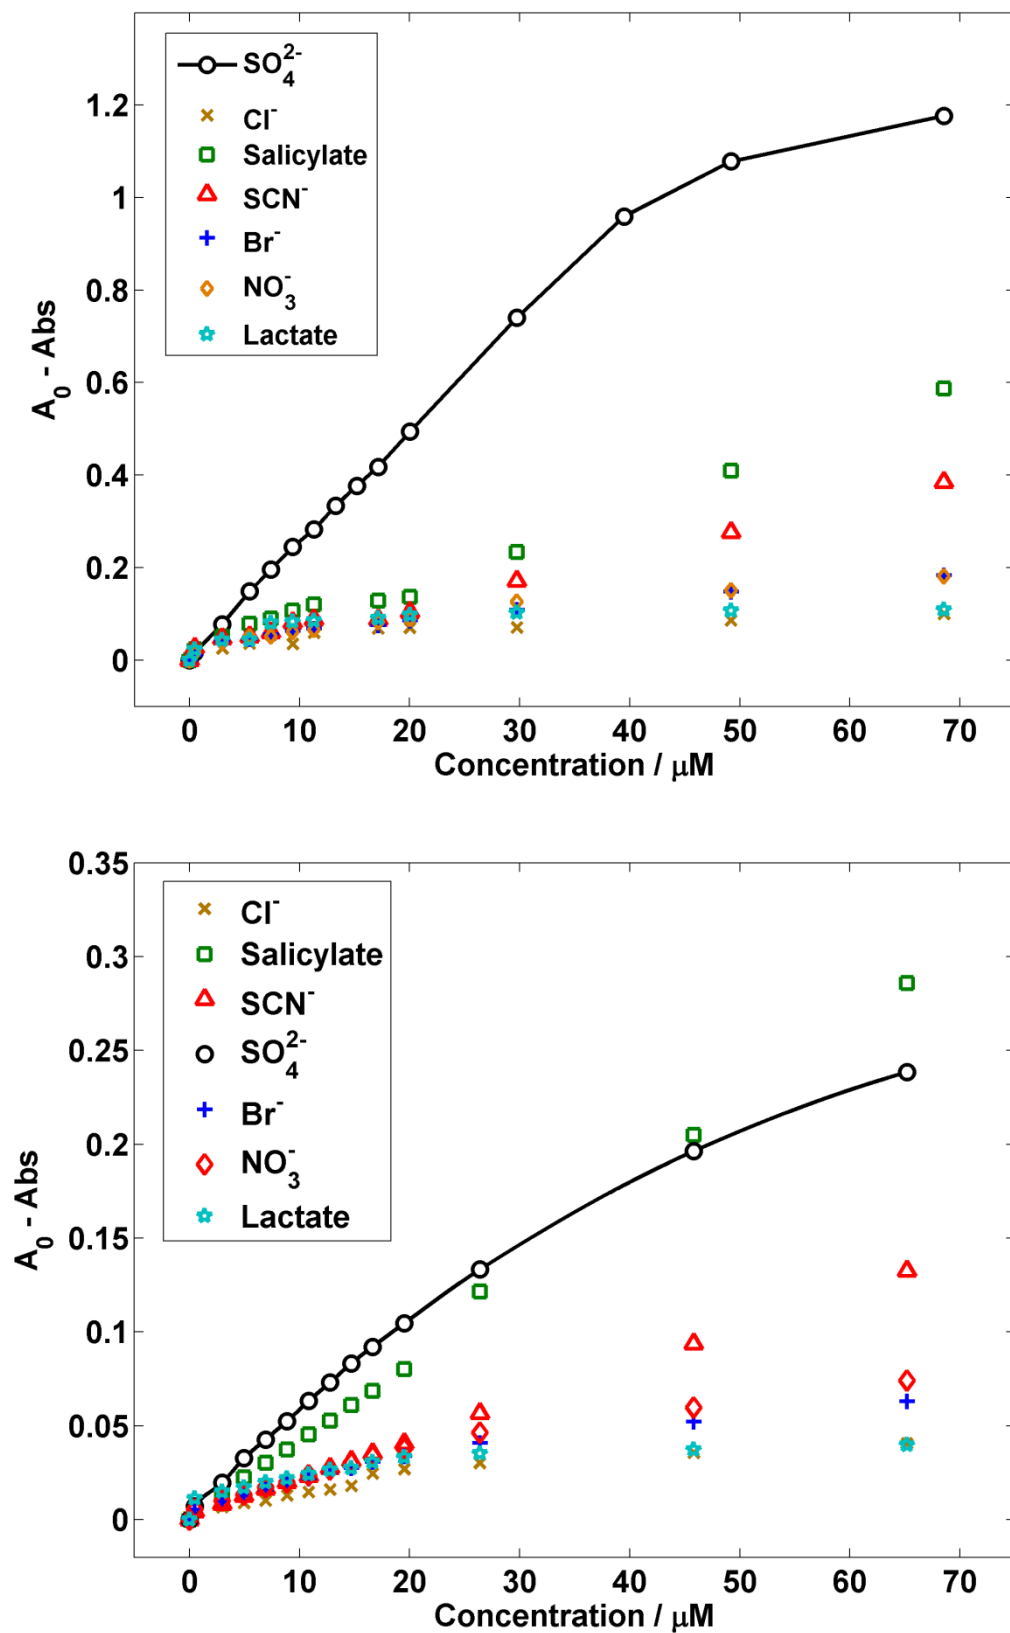

**Fig. S2.** Up: Spectra of the sulphate sensor in 10 mM HAc/MgAc at pH 4 upon an initial addition of  $\text{SO}_4^{2-}$  and successive additions of  $\text{Cl}^-$ . Down: The first two points show the initial absorbance ( $A_0$ ) at 459 nm and the change observed after the addition of  $\text{SO}_4^{2-}$  (25  $\mu\text{M}$ ) in the absence of  $\text{Cl}^-$ . Then, the graph displays the changes in absorbance for a solution with constant concentration of  $\text{SO}_4^{2-}$  (25  $\mu\text{M}$ ) upon the addition of increasing concentrations of  $\text{Cl}^-$ .

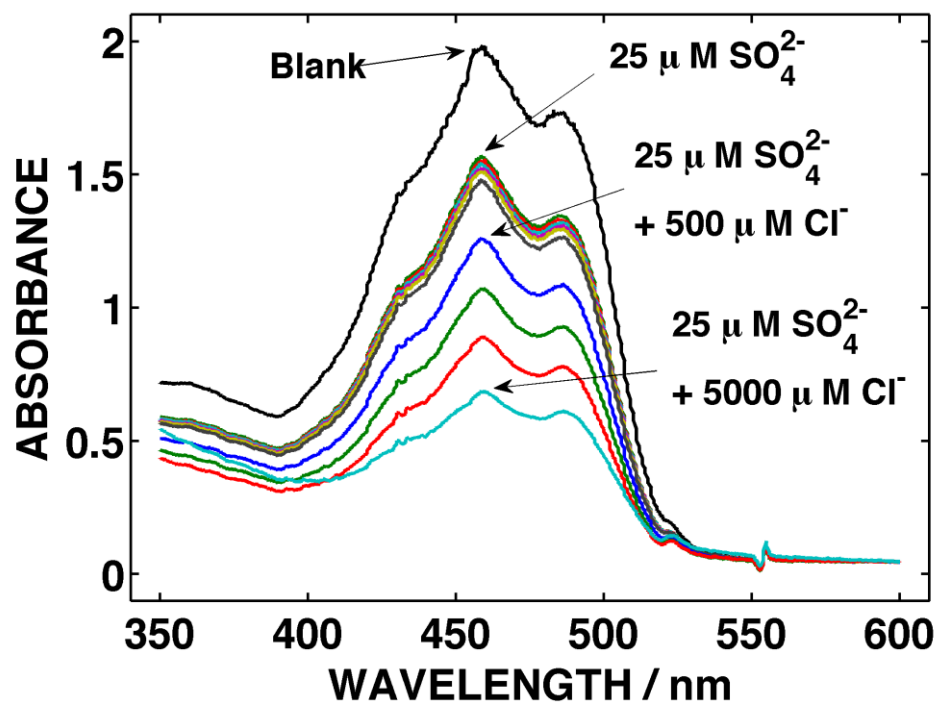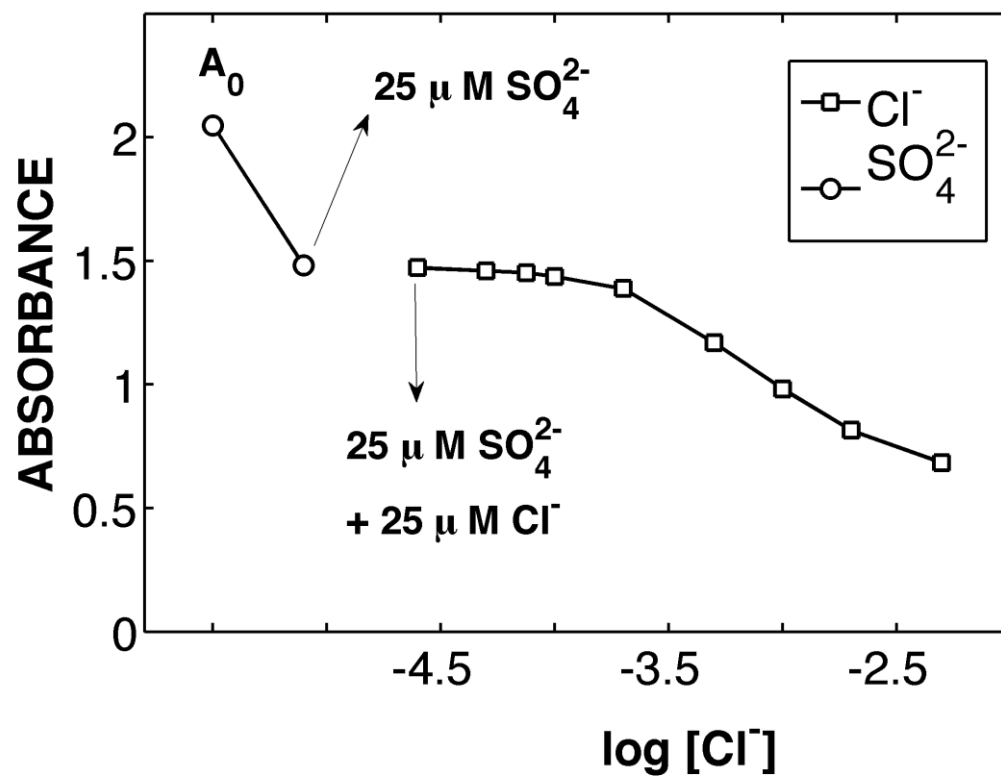

Supplement: c5cc02350e1.pdf [file c5cc02350e1.pdf]
